# Supplementary material for: Comparative Study of Crystallization, Mechanical Properties, and In Vitro Cytotoxicity of Nanocomposites at Low Filler Loadings of Hydroxyapatite for Bone-Tissue Engineering Based on Poly(l-lactic acid)/Cyclo Olefin Copolymer
Source: MDPI journal article supplement (doi:10.3390/polym13223865), 2021-11-09
Supplement: s1 [file s1]

# Comparative Study of Crystallization, Mechanical Properties, and In Vitro Cytotoxicity of Nanocomposites at Low Filler Loadings of Hydroxyapatite for Bone-Tissue Engineering Based on Poly(L-lactic Acid)/Cyclo Olefin Copolymer

Farzana Nazir <sup>1</sup> and Mudassir Iqbal <sup>1,\*</sup>

Department of Chemistry, School of Natural Sciences, National University of Science and Technology (NUST), Islamabad 44000, Pakistan; farzana.nazir@sns.nust.edu.pk

\* Correspondence: mudassir.iqbal@sns.nust.edu.pk; Tel.: +92-51-9085-5575

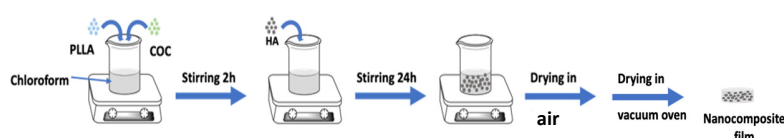

**Figure S1.** Preparation of PLLA/COC-nHA by physical blending method.

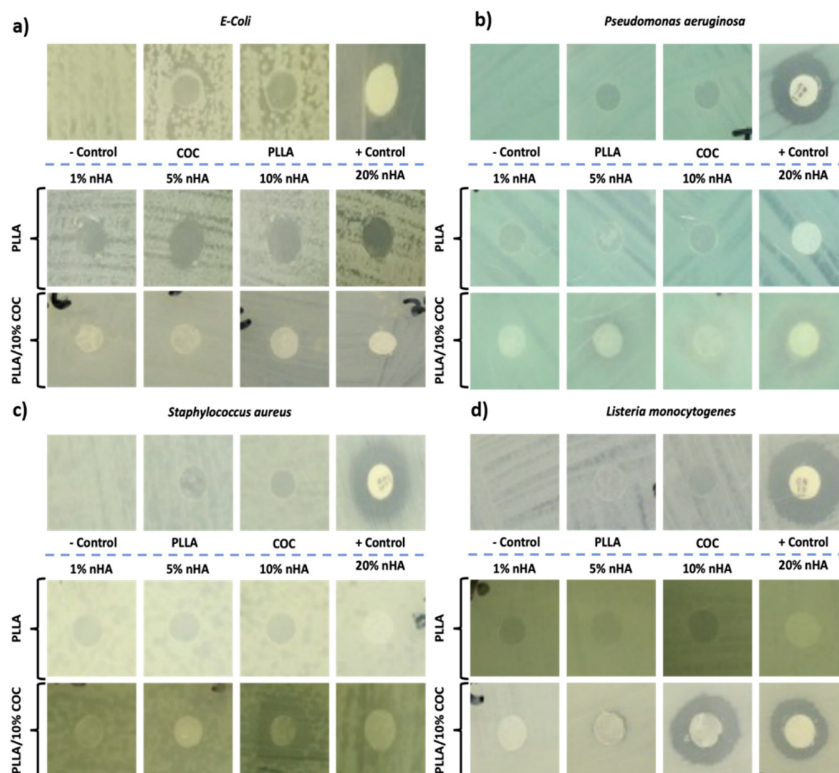

**Figure S2.** Antimicrobial activity of PLLA, COC, PLLA/nHA, PLLA/10% COC/nHA with (a) *E. Coli*, (b) *Pseudomonas aeruginosa*, (c) *Staphylococcus aureus* and (d) *Listeria monocytogenes*.

**Table S1.** PLLA/COC-nHA and PLLA-nHA nanocomposites composition prepared in 40 mL of Chloroform.

| Polymer System       | Sample Code | Weight of PLLA<br>(g) | Weight of COC<br>(g) | Weight of HA<br>(g) |
|----------------------|-------------|-----------------------|----------------------|---------------------|
| PLLA/COC-10          | PC10        | 0.90                  | 0.10                 | -                   |
| PLLA/COC-10-1wt%nHA  | PC10-HA1    | 0.90                  | 0.10                 | 0.01                |
| PLLA/COC-10-5wt%nHA  | PC10-HA5    | 0.90                  | 0.10                 | 0.05                |
| PLLA/COC-10-10wt%nHA | PC10-HA10   | 0.90                  | 0.10                 | 0.10                |
| PLLA/COC-10-20wt%nHA | PC10-HA20   | 0.90                  | 0.10                 | 0.20                |
| PLLA                 | PLLA        | 1.00                  | -                    | -                   |
| PLLA-1wt%nHA         | P-HA1       | 0.99                  | -                    | 0.01                |
| PLLA-5wt%nHA         | P-HA5       | 0.95                  | -                    | 0.05                |
| PLLA-10wt%nHA        | P-HA10      | 0.90                  | -                    | 0.10                |
| PLLA-20wt%nHA        | P-HA20      | 0.80                  | -                    | 0.20                |
